# Supplementary material
Source: PubMed Central journal article supplement (PMC2955133)
Supplement: 1010461107_pnas.201010461SI.pdf [file 1010461107_pnas.201010461SI.pdf]

# Supporting Information

Vlassenko et al. 10.1073/pnas.1010461107

Table S1. Sphere coordinates

| Coordinate name             | Axis |     |     |
|-----------------------------|------|-----|-----|
|                             | x    | y   | z   |
| Amygdala L                  | -31  | -1  | -30 |
| Amygdala R                  | 31   | -3  | -30 |
| Anterior cingulate L        | -9   | -41 | 8   |
| Anterior cingulate R        | 7    | -41 | 8   |
| Caudate L                   | -19  | -11 | 12  |
| Caudate R                   | 13   | -11 | 12  |
| Cerebellum L                | -27  | 61  | -22 |
| Cerebellum R                | 23   | 61  | -22 |
| Corona radiata L            | -21  | -15 | 36  |
| Corona radiata R            | 19   | -15 | 36  |
| Dorsomedial prefrontal L    | -9   | -49 | 34  |
| Dorsomedial prefrontal R    | 3    | -49 | 34  |
| Sup longitudinal fascicle L | -33  | 31  | 32  |
| Sup longitudinal fascicle R | 29   | 29  | 32  |
| Gyrus rectus L              | -11  | -29 | -16 |
| Gyrus rectus R              | 7    | -29 | -16 |
| Hippocampus L               | -27  | 23  | -18 |
| Hippocampus R               | 25   | 23  | -18 |
| Inferior frontal gyrus L    | -51  | -29 | 8   |
| Inferior frontal gyrus R    | 45   | -29 | 10  |
| Insula L                    | -39  | 13  | 4   |
| Insula R                    | 33   | 13  | 8   |
| Lateral temporal L          | -61  | 19  | -12 |
| Lateral temporal R          | 57   | 19  | -18 |
| Medial frontal gyrus L      | -11  | 5   | 66  |
| Medial frontal gyrus R      | 7    | 9   | 66  |
| Middle frontal gyrus L      | -41  | -29 | 36  |
| Middle frontal gyrus R      | 37   | -29 | 38  |
| Occipital L                 | -9   | 85  | -2  |
| Occipital R                 | 7    | 85  | -2  |
| Orbitofrontal L             | -27  | -33 | -8  |
| Orbitofrontal R             | 29   | -33 | -8  |
| Lateral parietal L          | -49  | 63  | 32  |
| Lateral parietal R          | 43   | 63  | 32  |
| Postcentral gyrus L         | -35  | 21  | 62  |
| Postcentral gyrus R         | 25   | 21  | 62  |
| Posterior cingulate L       | -9   | 49  | 34  |
| Posterior cingulate R       | 7    | 49  | 34  |
| Precentral gyrus L          | -43  | 5   | 48  |
| Precentral gyrus R          | 41   | 3   | 48  |
| Precuneus L                 | -9   | 61  | 42  |
| Precuneus R                 | 7    | 61  | 42  |
| Prefrontal L                | -29  | -53 | 12  |
| Prefrontal R                | 23   | -53 | 12  |
| Putamen L                   | -27  | -5  | 4   |
| Putamen R                   | 21   | -5  | 4   |
| Red nucleus L               | -7   | 29  | -8  |
| Red nucleus R               | 3    | 29  | -8  |
| Subcallosal gyrus L         | -9   | -13 | -8  |
| Subcallosal gyrus R         | 5    | -13 | -10 |
| Substantia nigra L          | 11   | 19  | -12 |
| Substantia nigra R          | -11  | 19  | -12 |
| Supramarginal gyrus L       | -41  | 41  | 42  |
| Supramarginal gyrus R       | 39   | 39  | 42  |
| Temporal medial L           | -55  | 1   | -20 |

Table S1. Cont.

| Coordinate name           | Axis |     |     |
|---------------------------|------|-----|-----|
|                           | x    | y   | z   |
| Temporal medial R         | 49   | -1  | -20 |
| Thalamus L                | -11  | 21  | 10  |
| Thalamus R                | 9    | 25  | 10  |
| Ventromedial prefrontal L | -9   | -47 | -8  |
| Ventromedial prefrontal R | 3    | -47 | -8  |

**Table S2. Sphere PIB binding**

| Coordinate name                  | <sup>11</sup> C-PIB-positive,<br>cognitively normal<br>elderly individuals | DAT  | <sup>11</sup> C-PIB-positive,<br>cognitively normal<br>elderly individuals/<br>cerebellum | DAT/cerebellum |
|----------------------------------|----------------------------------------------------------------------------|------|-------------------------------------------------------------------------------------------|----------------|
| Amygdala L                       | 0.65                                                                       | 0.66 | 0.09                                                                                      | 0.064          |
| Amygdala R                       | 0.67                                                                       | 0.66 | 0.11                                                                                      | 0.053          |
| Anterior cingulate L             | 1.01                                                                       | 0.94 | 0.68                                                                                      | 0.500          |
| Anterior cingulate R             | 1.05                                                                       | 1.02 | 0.75                                                                                      | 0.631          |
| Caudate L                        | 0.92                                                                       | 0.97 | 0.53                                                                                      | 0.548          |
| Caudate R                        | 0.87                                                                       | 1.00 | 0.44                                                                                      | 0.605          |
| Cerebellum L                     | 0.88                                                                       | 0.94 | 0.46                                                                                      | 0.508          |
| Cerebellum R                     | 0.78                                                                       | 0.89 | 0.30                                                                                      | 0.419          |
| Corona radiata L                 | 0.90                                                                       | 1.02 | 0.49                                                                                      | 0.628          |
| Corona radiata R                 | 0.82                                                                       | 0.80 | 0.37                                                                                      | 0.285          |
| Dorsomedial prefrontal L         | 0.84                                                                       | 0.90 | 0.40                                                                                      | 0.448          |
| Dorsomedial prefrontal R         | 1.00                                                                       | 1.06 | 0.67                                                                                      | 0.698          |
| Superior longitudinal fascicle L | 0.93                                                                       | 0.91 | 0.55                                                                                      | 0.457          |
| Superior longitudinal fascicle R | 0.76                                                                       | 0.80 | 0.26                                                                                      | 0.280          |
| Gyrus rectus L                   | 0.90                                                                       | 0.95 | 0.50                                                                                      | 0.523          |
| Gyrus rectus R                   | 0.93                                                                       | 1.08 | 0.55                                                                                      | 0.734          |
| Hippocampus L                    | 1.11                                                                       | 1.03 | 0.84                                                                                      | 0.655          |
| Hippocampus R                    | 0.94                                                                       | 1.03 | 0.56                                                                                      | 0.645          |
| Inferior frontal gyrus L         | 1.04                                                                       | 1.08 | 0.73                                                                                      | 0.723          |
| Inferior frontal gyrus R         | 1.12                                                                       | 1.15 | 0.87                                                                                      | 0.842          |
| Insula L                         | 0.85                                                                       | 0.95 | 0.42                                                                                      | 0.515          |
| Insula R                         | 1.01                                                                       | 1.15 | 0.68                                                                                      | 0.843          |
| Lateral temporal L               | 1.12                                                                       | 1.16 | 0.86                                                                                      | 0.858          |
| Lateral temporal R               | 1.06                                                                       | 1.24 | 0.76                                                                                      | 0.991          |
| Medial frontal gyrus L           | 0.92                                                                       | 1.12 | 0.53                                                                                      | 0.786          |
| Medial frontal gyrus R           | 0.80                                                                       | 0.84 | 0.34                                                                                      | 0.346          |
| Middle frontal gyrus L           | 0.88                                                                       | 0.93 | 0.46                                                                                      | 0.494          |
| Middle frontal gyrus R           | 1.02                                                                       | 1.18 | 0.70                                                                                      | 0.882          |
| Occipital L                      | 1.03                                                                       | 1.24 | 0.72                                                                                      | 0.978          |
| Occipital R                      | 0.88                                                                       | 1.07 | 0.46                                                                                      | 0.719          |
| Orbitofrontal L                  | 0.99                                                                       | 1.14 | 0.65                                                                                      | 0.822          |
| Orbitofrontal R                  | 1.13                                                                       | 1.41 | 0.88                                                                                      | 1.259          |
| Lateral parietal L               | 0.97                                                                       | 1.20 | 0.61                                                                                      | 0.924          |
| Lateral parietal R               | 1.19                                                                       | 1.36 | 0.97                                                                                      | 1.184          |
| Postcentral gyrus L              | 0.89                                                                       | 1.02 | 0.48                                                                                      | 0.631          |
| Postcentral gyrus R              | 0.99                                                                       | 1.21 | 0.65                                                                                      | 0.944          |
| Posterior cingulate L            | 0.83                                                                       | 1.01 | 0.38                                                                                      | 0.614          |
| Posterior cingulate R            | 0.80                                                                       | 0.96 | 0.33                                                                                      | 0.529          |
| Precentral gyrus L               | 1.13                                                                       | 1.20 | 0.89                                                                                      | 0.928          |
| Precentral gyrus R               | 0.93                                                                       | 1.08 | 0.54                                                                                      | 0.721          |
| Precuneus L                      | 1.20                                                                       | 1.44 | 1.00                                                                                      | 1.304          |
| Precuneus R                      | 1.14                                                                       | 1.43 | 0.90                                                                                      | 1.281          |
| Prefrontal L                     | 0.93                                                                       | 1.21 | 0.54                                                                                      | 0.929          |
| Prefrontal R                     | 1.31                                                                       | 1.47 | 1.17                                                                                      | 1.351          |
| Putamen L                        | 1.13                                                                       | 1.39 | 0.88                                                                                      | 1.227          |
| Putamen R                        | 0.98                                                                       | 1.00 | 0.62                                                                                      | 0.597          |
| Red nucleus L                    | 0.92                                                                       | 1.05 | 0.53                                                                                      | 0.685          |
| Red nucleus R                    | 1.27                                                                       | 1.46 | 1.11                                                                                      | 1.341          |
| Subcallosal gyrus L              | 0.93                                                                       | 1.16 | 0.55                                                                                      | 0.856          |
| Subcallosal gyrus R              | 1.14                                                                       | 1.28 | 0.90                                                                                      | 1.047          |
| Substantia nigra L               | 0.99                                                                       | 1.16 | 0.65                                                                                      | 0.855          |
| Substantia nigra R               | 1.08                                                                       | 1.29 | 0.80                                                                                      | 1.072          |
| Supramarginal gyrus L            | 1.06                                                                       | 1.21 | 0.76                                                                                      | 0.929          |
| Supramarginal gyrus R            | 1.00                                                                       | 1.16 | 0.67                                                                                      | 0.860          |
| Temporal medial L                | 1.08                                                                       | 1.28 | 0.80                                                                                      | 1.044          |
| Temporal medial R                | 1.02                                                                       | 1.20 | 0.70                                                                                      | 0.928          |
| Thalamus L                       | 1.11                                                                       | 1.53 | 0.84                                                                                      | 1.454          |
| Thalamus R                       | 1.00                                                                       | 1.14 | 0.66                                                                                      | 0.824          |
| Ventromedial prefrontal L        | 1.25                                                                       | 1.45 | 1.08                                                                                      | 1.318          |
| Ventromedial prefrontal R        | 1.06                                                                       | 1.52 | 0.76                                                                                      | 1.433          |

<sup>11</sup>C-PIB, Pittsburgh compound B; DAT, dementia of the Alzheimer type.

**Table S3. Sphere metabolic data**

| Coordinate name                  | GI   | FDG  | CMRO <sub>2</sub> |
|----------------------------------|------|------|-------------------|
| Amygdala L                       | -156 | 1.14 | 1.33              |
| Amygdala R                       | -152 | 1.12 | 1.30              |
| Anterior cingulate L             | -112 | 0.78 | 0.88              |
| Anterior cingulate R             | -109 | 0.82 | 0.91              |
| Caudate L                        | -63  | 0.96 | 1.02              |
| Caudate R                        | -60  | 1.29 | 1.39              |
| Cerebellum L                     | -56  | 0.97 | 1.02              |
| Cerebellum R                     | -49  | 1.16 | 1.23              |
| Corona radiata L                 | -46  | 1.03 | 1.08              |
| Corona radiata R                 | -45  | 0.90 | 0.93              |
| Dorsomedial prefrontal L         | -44  | 0.91 | 0.94              |
| Dorsomedial prefrontal R         | -43  | 0.84 | 0.87              |
| Superior longitudinal fascicle L | -41  | 0.82 | 0.85              |
| Superior longitudinal fascicle R | -33  | 1.09 | 1.13              |
| Gyrus rectus L                   | -24  | 1.29 | 1.34              |
| Gyrus rectus R                   | -24  | 1.07 | 1.11              |
| Hippocampus L                    | -17  | 0.65 | 0.63              |
| Hippocampus R                    | -6   | 1.22 | 1.24              |
| Inferior frontal gyrus L         | -3   | 0.65 | 0.62              |
| Inferior frontal gyrus R         | 8    | 0.74 | 0.70              |
| Insula L                         | 9    | 1.21 | 1.22              |
| Insula R                         | 9    | 1.04 | 1.03              |
| Lateral temporal L               | 10   | 0.76 | 0.72              |
| Lateral temporal R               | 18   | 1.34 | 1.34              |
| Medial frontal gyrus L           | 20   | 1.03 | 1.00              |
| Medial frontal gyrus R           | 42   | 1.03 | 0.99              |
| Middle frontal gyrus L           | 44   | 1.18 | 1.15              |
| Middle frontal gyrus R           | 46   | 1.11 | 1.05              |
| Occipital L                      | 49   | 1.09 | 1.03              |
| Occipital R                      | 49   | 1.14 | 1.09              |
| Orbitofrontal L                  | 56   | 1.17 | 1.11              |
| Orbitofrontal R                  | 58   | 1.17 | 1.12              |
| Lateral parietal L               | 58   | 1.37 | 1.34              |
| Lateral parietal R               | 59   | 1.12 | 1.06              |
| Postcentral gyrus L              | 61   | 1.15 | 1.09              |
| Postcentral gyrus R              | 62   | 1.22 | 1.17              |
| Posterior cingulate L            | 64   | 1.15 | 1.08              |
| Posterior cingulate R            | 67   | 1.16 | 1.09              |
| Precentral gyrus L               | 69   | 1.23 | 1.16              |
| Precentral gyrus R               | 70   | 1.11 | 1.03              |
| Precuneus L                      | 85   | 1.36 | 1.30              |
| Precuneus R                      | 87   | 1.25 | 1.18              |
| Prefrontal L                     | 91   | 1.23 | 1.15              |
| Prefrontal R                     | 93   | 1.31 | 1.22              |
| Putamen L                        | 96   | 1.28 | 1.19              |
| Putamen R                        | 100  | 1.30 | 1.21              |
| Red nucleus L                    | 101  | 1.28 | 1.19              |
| Red nucleus R                    | 103  | 1.34 | 1.25              |
| Subcallosal gyrus L              | 105  | 1.23 | 1.13              |
| Subcallosal gyrus R              | 106  | 1.29 | 1.19              |
| Substantia nigra L               | 108  | 1.27 | 1.16              |
| Substantia nigra R               | 111  | 1.12 | 0.99              |
| Supramarginal gyrus L            | 122  | 1.24 | 1.11              |
| Supramarginal gyrus R            | 122  | 1.22 | 1.10              |
| Temporal medial L                | 123  | 1.29 | 1.17              |
| Temporal medial R                | 132  | 1.27 | 1.14              |
| Thalamus L                       | 132  | 1.28 | 1.15              |
| Thalamus R                       | 134  | 1.29 | 1.15              |
| Ventromedial prefrontal L        | 134  | 1.43 | 1.31              |
| Ventromedial prefrontal R        | 155  | 1.31 | 1.15              |

CMRO<sub>2</sub>, cerebral metabolic rate for oxygen; FDG, <sup>18</sup>F-fluorodeoxy-D-glucose; GI, glycolytic index.
